# Supplementary material
Source: publisher figshare collection journal article supplement (https://geolsoc.figshare.com/ndownloader/files/22515731)
Supplement: Supplementary file 1 [file 22515731]

## Sheet: PlotDat1
Source sheet	Sheet2	0.0886646	0.0134622	0.0813823	0.0124	0.0819749	0.0124874	0.0891584	0.0134895	0.0889736	0.0134739	0.0887674	0.0134638
Plot name	Concordia1	0.0886967	0.0134575	0.0814907	0.012416	0.083041	0.0126444	0.0891539	0.0134937	0.0889711	0.0134763	0.0887661	0.013465
Plot Type	1	0.0886311	0.0134553	0.0817327	0.0124517	0.0841082	0.0128015	0.0891411	0.0134974	0.0889639	0.0134783	0.0887626	0.0134661
1st free col	15	IsoLine	IsoLine	0.0819749	0.0124874	0.0851764	0.0129587	0.0891201	0.0135004	0.0889521	0.0134801	0.0887567	0.013467
Sigma Level	2			0.0822171	0.0125231	0.0862456	0.0131158	0.0890913	0.0135028	0.0889359	0.0134814	0.0887488	0.0134676
Absolute Errs	FALSE			0.0824594	0.0125588	0.087316	0.013273	0.0890552	0.0135045	0.0889157	0.0134823	0.0887388	0.0134681
Symbol Type	1			0.0827017	0.0125945	0.0883873	0.0134302	0.0890124	0.0135054	0.0888917	0.0134828	0.088727	0.0134683
Inverse Plot	FALSE			0.082944	0.0126302	0.0894598	0.0135874	0.0889637	0.0135057	0.0888644	0.0134829	0.0887136	0.0134683
Color Plot	FALSE			0.0831865	0.0126659	0.0905332	0.0137446	0.0889099	0.0135051	0.0888342	0.0134825	0.0886987	0.0134681
3D plot	FALSE			0.0834289	0.0127016	0.0916078	0.0139019	0.0888518	0.0135039	0.0888016	0.0134817	0.0886827	0.0134677
Linear	FALSE			0.0836715	0.0127373	0.0926834	0.0140592	0.0887906	0.0135019	0.0887673	0.0134805	0.0886658	0.013467
Data Range	B5:F7			0.083914	0.012773	IsoLine	IsoLine	0.0887272	0.0134993	0.0887317	0.0134789	0.0886483	0.0134662
Filled Symbols	TRUE			0.0841567	0.0128087			0.0886627	0.013496	0.0886956	0.0134769	0.0886305	0.0134652
				0.0843994	0.0128444			0.0885982	0.0134921	0.0886594	0.0134746	0.0886127	0.013464
				0.0846421	0.0128801			0.0885349	0.0134878	0.0886239	0.013472	0.0885953	0.0134626
				0.0848849	0.0129158			0.0884738	0.013483	0.0885897	0.0134692	0.0885784	0.0134611
				0.0851278	0.0129515			0.088416	0.0134778	0.0885573	0.0134661	0.0885625	0.0134596
				0.0853707	0.0129872			0.0883624	0.0134724	0.0885272	0.013463	0.0885477	0.0134579
				0.0856137	0.0130229			0.088314	0.0134668	0.0885001	0.0134597	0.0885344	0.0134562
				0.0858567	0.0130587			0.0882716	0.0134611	0.0884763	0.0134564	0.0885227	0.0134545
				0.0860998	0.0130944			0.0882359	0.0134554	0.0884563	0.0134531	0.0885128	0.0134528
				0.0863429	0.0131301			0.0882076	0.0134499	0.0884405	0.0134498	0.088505	0.0134512
				0.0865861	0.0131658			0.0881871	0.0134445	0.088429	0.0134468	0.0884994	0.0134496
				0.0868293	0.0132015			0.0881747	0.0134395	0.088422	0.0134438	0.088496	0.0134481
				0.0870726	0.0132373			0.0881707	0.0134349	0.0884198	0.0134412	0.0884949	0.0134467
				0.0873159	0.013273			0.0881752	0.0134307	0.0884223	0.0134388	0.0884961	0.0134455
				0.0875593	0.0133087			0.088188	0.0134271	0.0884295	0.0134367	0.0884997	0.0134444
				0.0878028	0.0133444			0.088209	0.013424	0.0884413	0.013435	0.0885055	0.0134436
				0.0880463	0.0133802			0.0882378	0.0134216	0.0884575	0.0134337	0.0885135	0.0134429
				0.0882899	0.0134159			0.0882739	0.01342	0.0884777	0.0134328	0.0885234	0.0134425
				0.0885335	0.0134516			0.0883167	0.013419	0.0885017	0.0134323	0.0885352	0.0134422
				0.0887772	0.0134873			0.0883654	0.0134188	0.0885291	0.0134322	0.0885487	0.0134422
				0.0890209	0.0135231			0.0884193	0.0134193	0.0885593	0.0134326	0.0885636	0.0134424
				0.0892647	0.0135588			0.0884773	0.0134205	0.0885918	0.0134334	0.0885796	0.0134429
				0.0895085	0.0135945			0.0885385	0.0134225	0.0886262	0.0134346	0.0885965	0.0134435
				0.0897524	0.0136303			0.0886019	0.0134251	0.0886617	0.0134362	0.088614	0.0134443
				0.0899963	0.013666			0.0886664	0.0134284	0.0886979	0.0134381	0.0886317	0.0134454
				0.0902403	0.0137018			0.0887309	0.0134323	0.088734	0.0134404	0.0886495	0.0134466
				0.0904844	0.0137375			0.0887942	0.0134366	0.0887695	0.013443	0.088667	0.0134479
				0.0907285	0.0137732			0.0888553	0.0134415	0.0888037	0.0134459	0.0886838	0.0134494
				0.0909727	0.013809			0.0889131	0.0134466	0.0888362	0.0134489	0.0886998	0.013451
				0.0912169	0.0138447			0.0889667	0.013452	0.0888662	0.0134521	0.0887146	0.0134526
				0.0914612	0.0138805			0.0890151	0.0134576	0.0888933	0.0134554	0.0887279	0.0134543
				0.0917055	0.0139162			0.0890575	0.0134633	0.0889171	0.0134587	0.0887396	0.013456
				0.0919499	0.013952			0.0890932	0.013469	0.0889371	0.013462	0.0887494	0.0134577
				0.0921943	0.0139877			0.0891215	0.0134745	0.088953	0.0134652	0.0887572	0.0134594
				0.0924388	0.0140235			0.089142	0.0134799	0.0889645	0.0134683	0.0887629	0.013461
				0.0926833	0.0140592			0.0891544	0.0134849	0.0889714	0.0134712	0.0887663	0.0134625
				0.0929279	0.014095			0.0891584	0.0134895	0.0889736	0.0134739	0.0887674	0.0134638
				0.093	0.0141055			ErrEll	ErrEll	ErrEll	ErrEll	ErrEll	ErrEll
				IsoLine	IsoLine

## Sheet: PlotDat4
Source sheet	Sheet2	0.0886646	0.0134622	0.0872	0.013256	0.087316	0.013273	0.0891584	0.0134895	0.0889736	0.0134739	0.0887674	0.0134638
Plot name	Concordia2	0.0886967	0.0134575	0.0872186	0.0132587	0.0875302	0.0133044	0.0891539	0.0134937	0.0889711	0.0134763	0.0887661	0.013465
Plot Type	1	0.0886311	0.0134553	0.0872673	0.0132658	0.0877444	0.0133359	0.0891411	0.0134974	0.0889639	0.0134783	0.0887626	0.0134661
1st free col	15	IsoLine	IsoLine	0.087316	0.013273	0.0879587	0.0133673	0.0891201	0.0135004	0.0889521	0.0134801	0.0887567	0.013467
Sigma Level	2			0.0873646	0.0132801	0.088173	0.0133987	0.0890913	0.0135028	0.0889359	0.0134814	0.0887488	0.0134676
Absolute Errs	FALSE			0.0874133	0.0132873	0.0883873	0.0134302	0.0890552	0.0135045	0.0889157	0.0134823	0.0887388	0.0134681
Symbol Type	1			0.087462	0.0132944	0.0886017	0.0134616	0.0890124	0.0135054	0.0888917	0.0134828	0.088727	0.0134683
Inverse Plot	FALSE			0.0875107	0.0133016	0.0888162	0.0134931	0.0889637	0.0135057	0.0888644	0.0134829	0.0887136	0.0134683
Color Plot	FALSE			0.0875594	0.0133087	0.0890307	0.0135245	0.0889099	0.0135051	0.0888342	0.0134825	0.0886987	0.0134681
3D plot	FALSE			0.0876081	0.0133159	0.0892452	0.013556	0.0888518	0.0135039	0.0888016	0.0134817	0.0886827	0.0134677
Linear	FALSE			0.0876568	0.013323	IsoLine	IsoLine	0.0887906	0.0135019	0.0887673	0.0134805	0.0886658	0.013467
Data Range	B5:F7			0.0877054	0.0133301			0.0887272	0.0134993	0.0887317	0.0134789	0.0886483	0.0134662
Filled Symbols	TRUE			0.0877541	0.0133373			0.0886627	0.013496	0.0886956	0.0134769	0.0886305	0.0134652
				0.0878028	0.0133444			0.0885982	0.0134921	0.0886594	0.0134746	0.0886127	0.013464
				0.0878515	0.0133516			0.0885349	0.0134878	0.0886239	0.013472	0.0885953	0.0134626
				0.0879002	0.0133587			0.0884738	0.013483	0.0885897	0.0134692	0.0885784	0.0134611
				0.0879489	0.0133659			0.088416	0.0134778	0.0885573	0.0134661	0.0885625	0.0134596
				0.0879976	0.013373			0.0883624	0.0134724	0.0885272	0.013463	0.0885477	0.0134579
				0.0880464	0.0133802			0.088314	0.0134668	0.0885001	0.0134597	0.0885344	0.0134562
				0.0880951	0.0133873			0.0882716	0.0134611	0.0884763	0.0134564	0.0885227	0.0134545
				0.0881438	0.0133945			0.0882359	0.0134554	0.0884563	0.0134531	0.0885128	0.0134528
				0.0881925	0.0134016			0.0882076	0.0134499	0.0884405	0.0134498	0.088505	0.0134512
				0.0882412	0.0134087			0.0881871	0.0134445	0.088429	0.0134468	0.0884994	0.0134496
				0.0882899	0.0134159			0.0881747	0.0134395	0.088422	0.0134438	0.088496	0.0134481
				0.0883387	0.013423			0.0881707	0.0134349	0.0884198	0.0134412	0.0884949	0.0134467
				0.0883874	0.0134302			0.0881752	0.0134307	0.0884223	0.0134388	0.0884961	0.0134455
				0.0884361	0.0134373			0.088188	0.0134271	0.0884295	0.0134367	0.0884997	0.0134444
				0.0884848	0.0134445			0.088209	0.013424	0.0884413	0.013435	0.0885055	0.0134436
				0.0885336	0.0134516			0.0882378	0.0134216	0.0884575	0.0134337	0.0885135	0.0134429
				0.0885823	0.0134588			0.0882739	0.01342	0.0884777	0.0134328	0.0885234	0.0134425
				0.088631	0.0134659			0.0883167	0.013419	0.0885017	0.0134323	0.0885352	0.0134422
				0.0886798	0.0134731			0.0883654	0.0134188	0.0885291	0.0134322	0.0885487	0.0134422
				0.0887285	0.0134802			0.0884193	0.0134193	0.0885593	0.0134326	0.0885636	0.0134424
				0.0887772	0.0134874			0.0884773	0.0134205	0.0885918	0.0134334	0.0885796	0.0134429
				0.088826	0.0134945			0.0885385	0.0134225	0.0886262	0.0134346	0.0885965	0.0134435
				0.0888747	0.0135016			0.0886019	0.0134251	0.0886617	0.0134362	0.088614	0.0134443
				0.0889235	0.0135088			0.0886664	0.0134284	0.0886979	0.0134381	0.0886317	0.0134454
				0.0889722	0.0135159			0.0887309	0.0134323	0.088734	0.0134404	0.0886495	0.0134466
				0.089021	0.0135231			0.0887942	0.0134366	0.0887695	0.013443	0.088667	0.0134479
				0.0890697	0.0135302			0.0888553	0.0134415	0.0888037	0.0134459	0.0886838	0.0134494
				0.0891185	0.0135374			0.0889131	0.0134466	0.0888362	0.0134489	0.0886998	0.013451
				0.0891672	0.0135445			0.0889667	0.013452	0.0888662	0.0134521	0.0887146	0.0134526
				0.089216	0.0135517			0.0890151	0.0134576	0.0888933	0.0134554	0.0887279	0.0134543
				0.0892648	0.0135588			0.0890575	0.0134633	0.0889171	0.0134587	0.0887396	0.013456
				0.0893135	0.013566			0.0890932	0.013469	0.0889371	0.013462	0.0887494	0.0134577
				0.0893623	0.0135731			0.0891215	0.0134745	0.088953	0.0134652	0.0887572	0.0134594
				0.0894111	0.0135803			0.089142	0.0134799	0.0889645	0.0134683	0.0887629	0.013461
				0.0894598	0.0135874			0.0891544	0.0134849	0.0889714	0.0134712	0.0887663	0.0134625
				0.0895086	0.0135946			0.0891584	0.0134895	0.0889736	0.0134739	0.0887674	0.0134638
				0.0895458	0.0136			ErrEll	ErrEll	ErrEll	ErrEll	ErrEll	ErrEll
				IsoLine	IsoLine

## Sheet: Table
Table S1. U-Pb isotopic data
					Ratios								Ages (Ma)
Sample	Pb(c)	Pb*	U	Th	206 Pb	208 Pb	206 Pb		207 Pb		207 Pb		206 Pb		207 Pb		207 Pb		corr.
Fractions	(pg)	Pb(c)	(pg)	U	204 Pb	206 Pb	238 U	err	235 U	err	206 Pb	err	238 U	err	235 U	err	206 Pb	err	coef.
(a)	(b)	(b)	(c)		(d)	(e)	(f)	(2σ%)	(f)	(2σ%)	(f)	(2σ%)		(2σ)		(2σ)		(2σ)
RS14-18 Klibreck Sill
z4	0.162878	207.78	284.574	0.143555	13473.9	0.0441647	0.124554	0.0677942	1.14352	0.128699	0.0666159	0.0891038	756.724	0.484049	774.177	0.697142	824.85	1.97536	0.69918
z7	0.276627	2.33003	9.31186	0.281269	164.085	0.0880464	0.0701214	0.772945	0.580388	7.23364	0.0600568	7.01847	436.887	3.26501	464.711	26.9738	604.647	151.839	0.32758
z6	0.2479	12.0035	40.2443	0.608709	710.381	0.190613	0.0689662	0.231151	0.527069	2.03024	0.0554531	1.93712	429.924	0.961359	429.863	7.11518	429.533	43.1858	0.449441
z5	0.612514	35.5991	299.078	0.563231	2095.1	0.176382	0.068797	0.0784658	0.525442	0.570623	0.0554179	0.543376	428.904	0.325591	428.78	1.99576	428.118	12.1361	0.396335
z2	0.185459	119.773	288.156	0.809275	6591.46	0.253459	0.0684241	0.0555276	0.522486	0.195428	0.0554064	0.16814	426.654	0.229241	426.811	0.680987	427.656	3.81618	0.552231
z3	0.162772	501.234	1032.45	0.915955	26836.5	0.286871	0.068382	0.0686391	0.522293	0.128892	0.05542	0.0751963	426.401	0.283208	426.682	0.449026	428.204	1.82142	0.828
z1	0.198438	85.3736	226.937	0.683021	4850.76	0.213925	0.0683455	0.0626318	0.521597	0.273146	0.0553757	0.245075	426.18	0.258292	426.218	0.950737	426.422	5.51205	0.510021
RS14-19 Vagastie Bridge Granite
z3	0.193419	186.544	495.681	0.522721	11014.3	0.163664	0.0693982	0.0503759	0.531969	0.144418	0.0556202	0.113171	432.529	0.210741	433.115	0.509199	436.236	2.61808	0.657532
z2	0.18919	165.702	444.619	0.403124	10098	0.126221	0.0693715	0.0495137	0.53152	0.153766	0.0555946	0.126877	432.368	0.20706	432.818	0.541861	435.214	2.91346	0.589656
z1	0.222295	162.219	501.743	0.47577	9698.42	0.148966	0.0693669	0.0488434	0.531287	0.15619	0.055574	0.12904	432.34	0.204244	432.664	0.550246	434.386	2.96062	0.597112
z4	0.251607	209.419	726.878	0.510083	12403.3	0.159711	0.0693391	0.0489742	0.531356	0.131667	0.0556035	0.101095	432.172	0.204714	432.709	0.463893	435.569	2.36071	0.65872
RS14-20 Creag nan Suibheag Granite
z5	0.193777	12.6041	34.9017	0.367599	791.699	0.115094	0.0694648	0.178088	0.539675	1.43145	0.0563718	1.38235	432.93	0.745676	438.21	5.09459	466.045	30.6274	0.331171
z6	0.243717	12.5244	43.3569	0.394242	781.45	0.123439	0.0693974	0.181668	0.537378	1.49882	0.0561863	1.44535	432.524	0.759978	436.694	5.31959	458.741	32.0629	0.347801
z2	0.17275	47.1634	115.823	0.422813	2872.37	0.132408	0.0688543	0.0814921	0.526422	0.398548	0.055475	0.374822	429.25	0.338412	429.433	1.39563	430.414	8.38405	0.369017
z3	0.17703	87.6583	234.175	0.212723	5637	0.0666208	0.0687039	0.0691483	0.524911	0.227959	0.0554369	0.203474	428.342	0.286565	428.427	0.796762	428.882	4.59159	0.454423
RS14-26 Creag Mhor Quartz Monzodiorite
z6	1.40916	41.2849	739.633	0.557467	2425.21	0.174272	0.0741718	0.0703964	0.596549	0.441964	0.0583581	0.422973	461.241	0.313353	475.041	1.6768	542.248	9.27369	0.327244
z2	3.37766	98.2708	4595.48	0.546969	5775.51	0.171309	0.0684418	0.0594609	0.522579	0.218927	0.0554018	0.192941	426.761	0.245539	426.873	0.76296	427.473	4.36084	0.507751
z1	0.93256	353.025	4605.28	0.509404	20901	0.159547	0.0683952	0.0654538	0.523079	0.125496	0.0554927	0.0858312	426.48	0.270114	427.206	0.437626	431.126	2.04075	0.708961
z5	0.381513	206.549	1087.5	0.563285	12068.5	0.176423	0.0683743	0.0613949	0.522079	0.155279	0.0554035	0.116371	426.354	0.253291	426.539	0.540807	427.541	2.69078	0.698573
z4	0.406809	323.129	1848.12	0.497452	19193.7	0.15581	0.0682689	0.0516124	0.521127	0.114154	0.0553879	0.0764099	425.718	0.212625	425.904	0.397099	426.912	1.84678	0.749962
Notes:
(a) Thermally annealed and pre-treated single zircon. Analyses used in weighted mean date calculation are in bols.
(b) Pb(c) is total common-Pb in analyses; Pb* is radiogenic Pb.
(c) Total U content of the sample.
(d) Measured ratio corrected for spike and fractionation only.
(e) Radiogenic Pb ratio.
(f) Corrected for fractionation, spike and blank. Also corrected for initial Th/U disequilibrium using radiogenic 208Pb and Th/Umagma = 2.8.
Mass fractionation correction of 0.25%/amu ± 0.04%/amu (atomic mass unit) was applied to single-collector Daly analyses.
All common Pb assumed to be laboratory blank. Total procedural blank less than 0.1 pg for U.
Blank isotopic composition: 206Pb/204Pb = 18.15 ± 0.47, 207Pb/204Pb =15.30 ± 0.30, 208Pb/204Pb = 37.11 ± 0.87.
Corr. coef. = correlation coefficient.
Ages calculated using the decay constants λ238 = 1.55125E-10 y-1 and λ235 = 9.8485E-10 y-1 (Jaffey et al. 1971).
